# Supplementary material for: An Investigation into the Prevalence of Methamphetamine Related Enquiries to Local Government Environmental Health Officers
Source: MDPI journal article supplement (doi:10.3390/ijerph21040455), 2024-04-08
Supplement: s1 [file s1]

## **Methamphetamine contamination EHO Interview**

This interview is based on your current council area.

1. Do enquiries usually disclose why they believe there is methamphetamine contamination?

Yes

Sometimes

No

2. When speaking to public, what are most common questions about?

Clandestine labs (manufacture)

Personal use (smoking)

Businesses that provide testing services

Businesses that provide remediation services

Other

3. Does your council recommend any businesses to the public that offer testing or remediation services?

Yes

No

4. Have you handled a complaint or had negative experiences with businesses that provide testing and/or remediation services?

Yes

No

5. How often has this occurred?

I do not receive them on a regular basis

1-5

5-10

10-20

20+

6. Do you have a particular case that you found challenging that you would like to share with me?  
Please describe.

7. Do you feel like you have the tools to assist members of the public with methamphetamine contamination related enquiries?

Yes

No – please explain

8. Do you have any suggested improvements or comments about how methamphetamine contamination is handled on a council level?

No

Yes – please explain
